# Supplementary material for: Spontaneous clearance of asymptomatic anogenital and pharyngeal Neisseria gonorrhoeae: a secondary analysis from the NABOGO trial
Source: HighWire-hosted journal article supplement (doi:10.1136/sextrans-2022-055488), 2022-07-12
Supplement: sextrans-2022-055488supp002_data_supplement.pdf [file sextrans-2022-055488supp002_data_supplement.pdf]

1 **SUPPLEMENT TO:**

2

3 **Spontaneous clearance of anogenital and pharyngeal *Neisseria gonorrhoeae*: Results from the**

4 **NABOGO trial**

5 Buhari Teker, Henry J.C. de Vries, Titia Heijman, Alje P. van Dam, Maarten F. Schim van der Loeff, Vita

6 W. Jongen, on behalf of the New AntiBiotic treatment Options for uncomplicated GOnorrhoea

7 (NABOGO) trial

8 **Caption to figure**

9

10 **Supplementary Figure 1:** Flow chart of the inclusion in the study and the anatomical locations of Ng infections,  
11 NABOGO trial, Amsterdam, the Netherlands, September 18<sup>th</sup> 2017 to June 5<sup>th</sup> 2020

12 Note 1: Patients with a single Ng infection: 120 anal Ng, 0 pharyngeal Ng, 10 vaginal Ng, 8 urethral Ng.

13 Note 2: Patients with a double Ng infection: 80 anal and pharyngeal Ng, 2 anal and vaginal Ng, 10 anal and  
14 urethral Ng, 1 pharyngeal and vaginal Ng, 0 pharyngeal and urethral Ng.

15 Note 3: Patients with a triple Ng infection: 0 anal, pharyngeal, and vaginal Ng, 10 anal, pharyngeal, and urethral  
16 Ng.

17 Note 4: Exclusion criteria were: suspicion of a complicated Ng infection (e.g. pelvic inflammatory disease or  
18 epididymitis), another (sexually transmitted) infection or suspicion of another infection for which antimicrobial  
19 therapy was indicated, pregnancy, having a wish to become pregnant or breastfeeding, not being able to  
20 read/understand Dutch or English, a newly diagnosed HIV infection, an HIV infection with a CD4+ cell-count <200  
21 cells/ $\mu$ L, known allergy or adverse reactions to ceftriaxone, ertapenem, gentamicin or fosfomycin, renal  
22 impairment, liver cirrhosis, congestive heart failure, myasthenia gravis, hearing loss or balance disorder,  
23 concurrent use of systemic antibacterial antimicrobials other than nitrofurantoin or metronidazole (currently or in  
24 the two weeks prior to study enrolment), systemic immunosuppressive drugs, valproic acid, or metoclopramide,  
25 and previous enrolment in the study.

26 **Supplementary Table 1:** Determinants of spontaneous clearance in patients with an anal Ng infection. Results of  
 27 the univariable and multivariable logistic regression analyses, NABOGO trial, Amsterdam, the Netherlands,  
 28 September 18th 2017 to June 5th 2020

|                                                                      | Univariable logistic regression |                      |                  | Multivariable logistic regression |                    |              |
|----------------------------------------------------------------------|---------------------------------|----------------------|------------------|-----------------------------------|--------------------|--------------|
|                                                                      | OR                              | 95% CI               | p-value          | aOR                               | 95% CI             | p-value      |
| <b>Time (in days) between T<sub>-1</sub> and T<sub>0</sub>-visit</b> | 1.06                            | (0.99-1.12)          | 0.088            | 1.06                              | (0.99-1.13)        | 0.110        |
| <i>Demographics</i>                                                  |                                 |                      |                  |                                   |                    |              |
| <b>Age, per 10-year increase</b>                                     | 0.84                            | (0.59-1.20)          | 0.338            |                                   |                    |              |
| <b>Age</b>                                                           |                                 |                      |                  |                                   |                    |              |
| < 30 years                                                           | REF                             |                      | 0.254            | REF                               |                    |              |
| 30 - 39 year                                                         | 0.50                            | (0.20-1.30)          |                  | 0.52                              | (0.19-1.44)        | 0.209        |
| ≥ 40 years                                                           | 0.56                            | (0.22-1.38)          |                  | 0.86                              | (0.30-2.50)        | 0.782        |
| <b>Gender identity</b>                                               |                                 |                      |                  |                                   |                    |              |
| Male                                                                 | <b>REF</b>                      |                      | <b>0.007</b>     |                                   |                    |              |
| Female or transgender                                                | <b>8.86</b>                     | <b>(1.88- 41.68)</b> |                  |                                   |                    |              |
| <b>Ethnicity</b>                                                     |                                 |                      |                  |                                   |                    |              |
| Dutch                                                                | REF                             |                      | 0.129            |                                   |                    |              |
| Non-Dutch                                                            | 1.81                            | (0.85-3.86)          |                  |                                   |                    |              |
| <b>Highest education level</b>                                       |                                 |                      |                  |                                   |                    |              |
| None/primary/secondary                                               | REF                             |                      | 0.450            |                                   |                    |              |
| College/university                                                   | 0.85                            | (0.34-2.13)          |                  |                                   |                    |              |
| Other                                                                | 0.29                            | (0.03-2.59)          |                  |                                   |                    |              |
| <i>Health</i>                                                        |                                 |                      |                  |                                   |                    |              |
| <b>HIV status</b>                                                    |                                 |                      |                  |                                   |                    |              |
| HIV-negative + no PrEP-user                                          | REF                             |                      | 0.176            | REF                               |                    |              |
| HIV-negative + PrEP-user                                             | 0.42                            | (0.16-1.10)          |                  | 0.62                              | (0.21-1.84)        | 0.394        |
| HIV-positive                                                         | 0.69                            | (0.26-1.87)          |                  | 0.97                              | (0.30-3.13)        | 0.962        |
| <b>Antibiotic use<sup>1</sup></b>                                    |                                 |                      |                  |                                   |                    |              |
| No                                                                   | REF                             |                      | 0.862            |                                   |                    |              |
| Yes                                                                  | 0.90                            | (0.29-2.84)          |                  |                                   |                    |              |
| <i>Sexual behaviour</i>                                              |                                 |                      |                  |                                   |                    |              |
| <b>Sexual risk group</b>                                             |                                 |                      |                  |                                   |                    |              |
| MSM                                                                  | <b>REF</b>                      |                      | <b>0.007</b>     |                                   |                    |              |
| MSW, Women, TGP                                                      | <b>8.86</b>                     | <b>(1.88-41.68)</b>  |                  |                                   |                    |              |
| <b>No. of sexual partner(s)<sup>2,3</sup></b>                        | <b>0.42</b>                     | <b>(0.26-0.70)</b>   | <b>&lt;0.001</b> |                                   |                    |              |
| <b>No. of sexual partner(s), in tertiles</b>                         |                                 |                      |                  |                                   |                    |              |
| ≤ 5 partners                                                         | <b>REF</b>                      |                      | <b>0.001</b>     | <b>REF</b>                        |                    |              |
| 6-15 partners                                                        | <b>0.25</b>                     | <b>(0.10-0.64)</b>   |                  | <b>0.26</b>                       | <b>(0.10-0.67)</b> | <b>0.006</b> |
| ≥ 16 partners                                                        | <b>0.21</b>                     | <b>(0.07-0.61)</b>   |                  | <b>0.23</b>                       | <b>(0.08-0.75)</b> | <b>0.014</b> |

30

31

32

33

34

35

36

37

38

39

40

**Abbreviations:** aOR, adjusted odds ratio; CI, confidence interval; HIV, human immunodeficiency virus; MSM, Men who have sex with men; MSW, Men who have sex with women; NABOGO, New AntiBiotic treatment Options for uncomplicated Gonorrhoea; Ng, *Neisseria gonorrhoeae*; OR, odds ratio; PrEP, pre-exposure prophylaxis; REF, reference; TGP, transgender person

Note 1: spontaneous clearance could not be assessed in one anal Ng infection due to invalid NAAT result at T<sub>0</sub>

1. In the preceding 3 months before T<sub>-1</sub>.

2. In the preceding 6 months before T<sub>-1</sub>.

3. OR per (log+1) increase in no. of sexual partners.

41 **Supplementary Table 2:** Determinants of spontaneous clearance in patients with a pharyngeal Ng infection.  
 42 Results of the univariable and multivariable logistic regression analyses, NABOGO trial, Amsterdam, the

|                                                                       | Univariable logistic regression |                    |                | Multivariable logistic regression |                    |                |
|-----------------------------------------------------------------------|---------------------------------|--------------------|----------------|-----------------------------------|--------------------|----------------|
|                                                                       | <i>OR</i>                       | <i>95% CI</i>      | <i>p-value</i> | <i>aOR</i>                        | <i>95% CI</i>      | <i>p-value</i> |
| <b>Time (in days) between T<sub>-1</sub>- and T<sub>0</sub>-visit</b> | <b>1.13</b>                     | <b>(1.01-1.27)</b> | <b>0.027</b>   | <b>1.17</b>                       | <b>(1.03-1.34)</b> | <b>0.014</b>   |
| <i>Demographics</i>                                                   |                                 |                    |                |                                   |                    |                |
| <b>Age, per 10-year increase</b>                                      | 0.99                            | (0.56-1.73)        | 0.969          |                                   |                    |                |
| <b>Age</b>                                                            |                                 |                    |                |                                   |                    |                |
| < 30 years                                                            | REF                             |                    | 0.699          | REF                               |                    |                |
| 30 - 39 year                                                          | 0.59                            | (0.16-2.13)        |                | 0.66                              | (0.16-2.70)        | 0.563          |
| ≥ 40 years                                                            | 0.92                            | (0.24-3.43)        |                | 1.71                              | (0.30-9.58)        | 0.544          |
| <b>Gender identity<sup>2</sup></b>                                    |                                 |                    |                |                                   |                    |                |

43 Netherlands, September 18<sup>th</sup> 2017 to June 5<sup>th</sup> 2020

44

|                                               |                   |                    |                   |             |                    |              |
|-----------------------------------------------|-------------------|--------------------|-------------------|-------------|--------------------|--------------|
| Male                                          | REF               |                    | N.E. <sup>1</sup> |             |                    |              |
| Female or transgender                         | N.E. <sup>1</sup> | N.E. <sup>1</sup>  |                   |             |                    |              |
| <b>Ethnicity</b>                              |                   |                    |                   |             |                    |              |
| Dutch                                         | REF               |                    | 0.403             |             |                    |              |
| Non-Dutch                                     | 0.60              | (0.18-2.04)        |                   |             |                    |              |
| <b>Highest education level<sup>3</sup></b>    |                   |                    |                   |             |                    |              |
| None/primary/secondary                        | REF               |                    | N.E. <sup>1</sup> |             |                    |              |
| College/university                            | N.E. <sup>1</sup> | N.E. <sup>1</sup>  |                   |             |                    |              |
| Other                                         | N.E. <sup>1</sup> | N.E. <sup>1</sup>  |                   |             |                    |              |
| <i>Health</i>                                 |                   |                    |                   |             |                    |              |
| <b>HIV status</b>                             |                   |                    |                   |             |                    |              |
| HIV-negative + no PrEP-user                   | REF               |                    | 0.164             | REF         |                    |              |
| HIV-negative + PrEP-user                      | 0.30              | (0.06-1.45)        |                   | 0.17        | (0.03-1.10)        | 0.063        |
| HIV-positive                                  | 1.54              | (0.34-6.86)        |                   | 0.71        | (0.11-4.67)        | 0.721        |
| <b>Antibiotic use<sup>4</sup></b>             |                   |                    |                   |             |                    |              |
| No                                            | REF               |                    | 0.390             |             |                    |              |
| Yes                                           | 1.96              | (0.44-8.71)        |                   |             |                    |              |
| <i>Sexual behaviour</i>                       |                   |                    |                   |             |                    |              |
| <b>Sexual risk group<sup>5</sup></b>          |                   |                    |                   |             |                    |              |
| MSM                                           | REF               |                    | N.E. <sup>1</sup> |             |                    |              |
| MSW, Women, TGP                               | N.E. <sup>1</sup> | N.E. <sup>1</sup>  |                   |             |                    |              |
| <b>No. of sexual partner(s)<sup>6,7</sup></b> | 0.74              | (0.39-1.39)        | 0.350             |             |                    |              |
| <b>No. of sexual partner(s), in tertiles</b>  |                   |                    |                   |             |                    |              |
| ≤ 5 partners                                  | <b>REF</b>        |                    | <b>0.040</b>      | <b>REF</b>  |                    |              |
| 6-15 partners                                 | <b>0.20</b>       | <b>(0.05-0.86)</b> |                   | <b>0.12</b> | <b>(0.02-0.65)</b> | <b>0.014</b> |
| ≥ 16 partners                                 | <b>0.85</b>       | <b>(0.25-2.91)</b> |                   | 1.13        | (0.24-5.42)        | 0.879        |

45 **Abbreviations:** aOR, adjusted odds ratio; CI, confidence interval; HIV, human immunodeficiency virus; MSM,  
 46 Men who have sex with men; MSW, Men who have sex with women; NABOGO, New AntiBiotic treatment Options  
 47 for uncomplicated Gonorrhoea; Ng, *Neisseria gonorrhoeae*; N.E., not estimable; OR, odds ratio; PrEP, pre-  
 48 exposure prophylaxis; REF, reference; TGP, transgender person  
 49

- 50 1. Not estimable as one of the cells has zero observations  
 51 2. Gender was not taken into account as no females or transgender persons spontaneously cleared a pharyngeal  
 52 Ng infection  
 53 3. Education level was not taken into account as no persons with none, primary and secondary education level  
 54 spontaneously cleared a pharyngeal Ng  
 55 4. In the preceding 3 months before T.<sub>1</sub>  
 56 5. Sexual risk group was not taken into account as no MSW, women, and TGP spontaneously cleared a  
 57 pharyngeal Ng  
 58 6. In the preceding 6 months before T.<sub>1</sub>.  
 59 7. OR per (log+1) increase in no. of sexual partners.
