# Supplementary figures and images for: Spontaneous clearance of asymptomatic anogenital and pharyngeal Neisseria gonorrhoeae: a secondary analysis from the NABOGO trial
Source: HighWire-hosted journal article supplement (doi:10.1136/sextrans-2022-055488), 2022-07-12

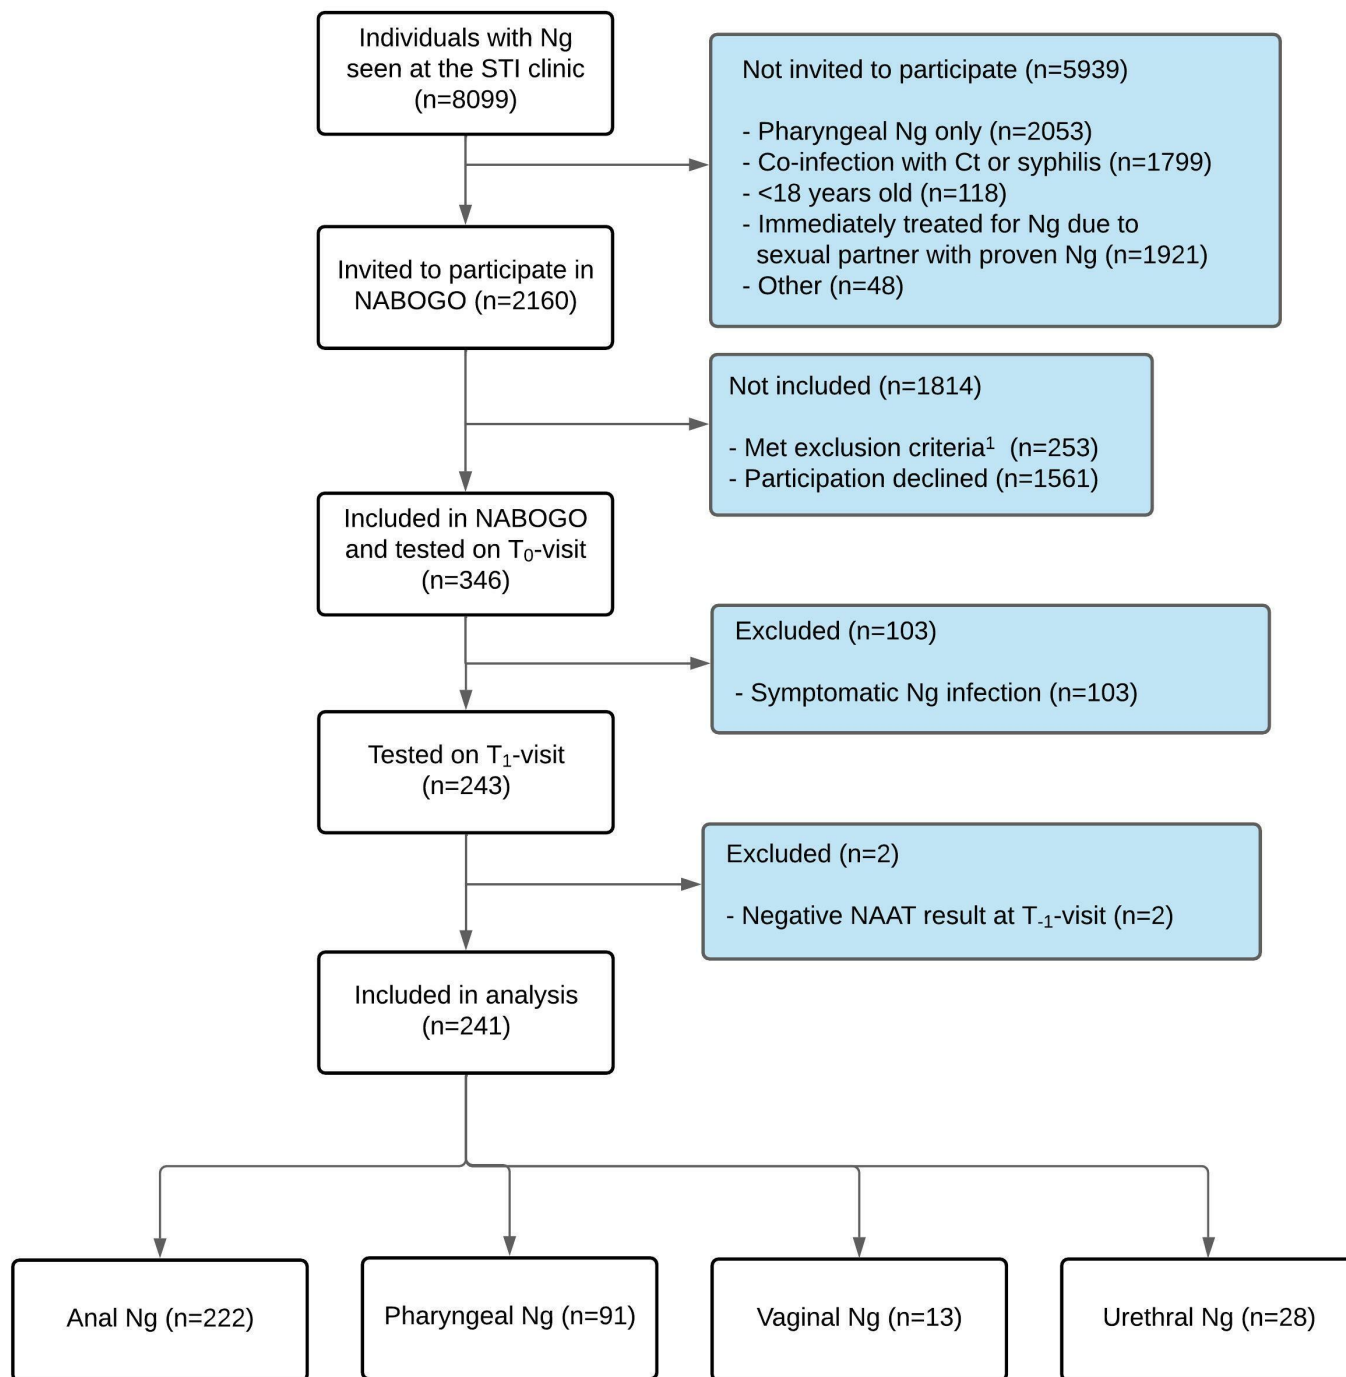

Supplement: sextrans-2022-055488supp001_data_supplement.pdf [file sextrans-2022-055488supp001_data_supplement.pdf]
